# Supplementary material
Source: MDPI journal article supplement (https://www.mdpi.com/2071-1050/15/10/7883)
Supplement: s1 [file s1 › sustainability-2307281-supplementary.pdf]

## SUPPLEMENTARY MATERIAL

### The research tool of the quantitative study carried out on Romanian farmers

#### 1. Have you heard about bioeconomy?

- ☐ Yes (*move to Question 2*)
- ☐ No (*the survey ends here*)

#### 2. What term do you associate the bioeconomy with?

- ☐ Biodiversity
- ☐ Ecology
- ☐ Limited resources
- ☐ Natural resources
- ☐ Rural area activity
- ☐ Renewable energy
- ☐ Others\_\_\_\_\_

#### 3. The authorities in Romania developed official documents referring to bioeconomy. Which of the following have you heard of? (*multiple answer*):

|                                                                                                                                                                                          | I heard of               | I haven't heard of       |
|------------------------------------------------------------------------------------------------------------------------------------------------------------------------------------------|--------------------------|--------------------------|
| Strategy for the development of the agri-food sector in the medium and long term Horizon 2020-2030                                                                                       | <input type="checkbox"/> | <input type="checkbox"/> |
| Romania's national strategy 2020 – 2025                                                                                                                                                  | <input type="checkbox"/> | <input type="checkbox"/> |
| National Research, Development and Innovation Strategy 2014 – 2020                                                                                                                       | <input type="checkbox"/> | <input type="checkbox"/> |
| The project "Research on the identification of bioeconomy development priorities in Romania for the period 2016-2030"                                                                    | <input type="checkbox"/> | <input type="checkbox"/> |
| Increasing the administrative capacity of the Ministry for Business Environment, Trade and Entrepreneurship to develop and implement the evidence-based public policy system" - SIPOCA 5 | <input type="checkbox"/> | <input type="checkbox"/> |

#### 4. On a scale from 1 to 5, how important do you consider that agriculture is for bioeconomy? (1-unimportant; 2-slightly important; 3-moderately important; 4-important; 5-very important)

1                  2                  3                  4                  5

unimportant   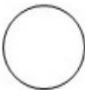   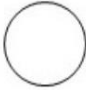   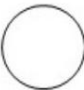   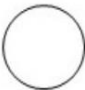   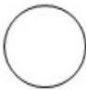   very important

#### 5. Do public institutions in Romania get involved in explaining bioeconomy to agricultural workers?

- ☐ Yes, I have been informed
- ☐ Yes, but I don't know details
- ☐ No, I have not been informed
- ☐ Don't know/don't answer

**6. On a scale from 1 to 5, how important do you believe bioeconomy is for the economy of Romania? (1-unimportant; 2-slightly important; 3-moderately important; 4-important; 5-very important)**

1                  2                  3                  4                  5

unimportant      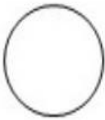      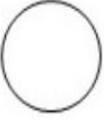      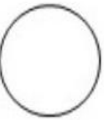      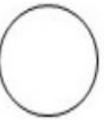      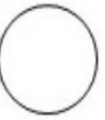      very important

**7. To what extent do you agree or disagree with the following statements:**

|                                                                                                                      | Strongly agree           | Agree                    | Slightly agree/undecided | Strongly disagree        | Don't know/Don't answer  |
|----------------------------------------------------------------------------------------------------------------------|--------------------------|--------------------------|--------------------------|--------------------------|--------------------------|
| The bioeconomy will support agriculture in Romania.                                                                  | <input type="checkbox"/> |
| The bioeconomy can ensure a higher standard of living for farmers                                                    | <input type="checkbox"/> |
| The bioeconomy contributes to protecting the environment and combating climate change                                | <input type="checkbox"/> |
| The bioeconomy provides consumers with organic food                                                                  | <input type="checkbox"/> |
| Bioeconomy can be an encouraging field for young people in Romania to get more involved in agriculture               | <input type="checkbox"/> |
| The bioeconomy is a new model of life, activity and a successful way to ensure food for the population in the future | <input type="checkbox"/> |
| Romania needs a strategy dedicated to the bioeconomy                                                                 | <input type="checkbox"/> |

**8. On a scale from 1 to 5, do you consider that the bioeconomy can contribute to cheapening of the resources needed for agricultural activities? (1-definitely not; 2-probably not; 3-possibly; 4-probably; 5-definitely)**

1                  2                  3                  4                  5

definitely not      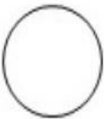      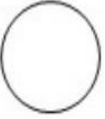      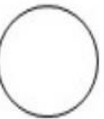      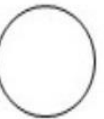      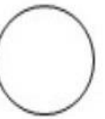      definitely

9. From your point of view, should the bioeconomy represent more than the use of forest biomass in the process of obtaining energy?

- ☐ Yes  
☐ No  
☐ Don't know/Don't answer

10. Regarding the role of the bioeconomy in the economic activity of Romania, how do you assess the following:

|                                                                                          | Unimportant              | Slightly important       | Moderately important     | Important                | Very important           |
|------------------------------------------------------------------------------------------|--------------------------|--------------------------|--------------------------|--------------------------|--------------------------|
| Involvement of public institutions in bioeconomy implementation                          | <input type="checkbox"/> |
| A closer relationship between specialists and farmers                                    | <input type="checkbox"/> |
| Informing farmers about how to create a symbiosis between agriculture and the bioeconomy | <input type="checkbox"/> |

11. Do you believe that bioeconomy can contribute to Romania's economic development? (1-not at all; 2-very little; 3-little; 4-moderately; 5-a lot)

1                  2                  3                  4                  5

not at all      ☐      ☐      ☐      ☐      ☐      a lot

12. In your activity, have you allocated a part of the investment budget in the reuse or recycling of agricultural waste? If yes, please specify the average annual amount.

---



---

13. In the process of implementing the bioeconomy concept in Romanian agriculture, it is necessary to increase funding from:

- ☐ Public authorities in Romania  
☐ European Commission  
☐ Romanian private investors  
☐ Foreign private investors

14. What is the type of agricultural enterprise in which you operate?

- ☐ Vegetable farm  
☐ Livestock farm  
☐ Mixed farm (vegetable and livestock farming)  
☐ Agricultural processing unit  
☐ Village household  
☐ Others\_\_\_\_\_

**15. How many employees are there in the agricultural unit you work in?**

- ☐ 0-50
- ☐ 51-100
- ☐ 101-250
- ☐ Over 250

**16. What is your occupation?**

- ☐ Member of an agricultural association
- ☐ Farmer
- ☐ Householder
- ☐ Seasonal employee in agriculture
- ☐ Other\_\_\_\_\_

**17. Residency environment:**

- ☐ Urban
- ☐ Rural

**18. Please specify the town where you operate.**

---

---

**19. What level of education do you have?**

- ☐ Middle school
- ☐ Secondary school
- ☐ Faculty
- ☐ Post-secondary school
- ☐ Masters
- ☐ Doctorate
- ☐ Others\_\_\_\_\_

**20. Do you have studies in fields specific to agriculture?**

- ☐ Agricultural high-school
- ☐ Faculty of Agronomy
- ☐ Specialization courses in the agricultural field
- ☐ Post-secondary school in agriculture
- ☐ No
- ☐ Others\_\_\_\_\_

**21. Your gender is:**

- ☐ Masculine
- ☐ Feminine

**22. What age category do you fall into?**

- ☐ 18-24 years old
- ☐ 25-34 years old
- ☐ 35-49 years old
- ☐ 50-64 years old
- ☐ Over 65 years old

**Thank you!**
